# Supplementary material for: Uncertainty quantification and sensitivity analysis of neuron models with ion concentration dynamics
Source: PubMed Central journal article supplement (PMC11108148; doi:10.1371/journal.pone.0303822), 2024-05-21
Supplement: pone.0303822.s001.pdf [file pone.0303822.s001.pdf]

---

# S1 Appendix

## MODEL PARAMETERS AND INITIAL CONDITIONS

**Table S1. Geometrical parameters**

| Parameter            |                                            | Value                   | Units           |
|----------------------|--------------------------------------------|-------------------------|-----------------|
| $\Delta x$           | distance between the two layers            | $6.67 \times 10^{-2}$   | cm              |
| $\alpha$             | intracellular coupling strength            | 2                       |                 |
| $A_m$                | membrane area of each cellular compartment | $6.16 \times 10^{-6}$   | cm <sup>2</sup> |
| $A_i$                | intracellular cross-section areas          | $\alpha \cdot A_m$      | cm <sup>2</sup> |
| $A_e$                | extracellular cross-section area           | $6.16 \times 10^{-7}$   | cm <sup>2</sup> |
| $V_{sn,0}, V_{dn,0}$ | initial neuronal volumes                   | $1.437 \times 10^{-9}$  | cm <sup>3</sup> |
| $V_{se,0}, V_{de,0}$ | initial extracellular volumes              | $7.185 \times 10^{-10}$ | cm <sup>3</sup> |
| $V_{sg,0}, V_{dg,0}$ | initial glial volumes                      | $1.437 \times 10^{-9}$  | cm <sup>3</sup> |

**Table S2. Diffusion constants, tortuosities, and intraneuronal fractions of mobile ions**

| Parameter                            |                                        | Value                 | Units                              |
|--------------------------------------|----------------------------------------|-----------------------|------------------------------------|
| $D_{Na}$                             | Na <sup>+</sup> diffusion constant     | $1.33 \times 10^{-8}$ | cm <sup>2</sup> · ms <sup>-1</sup> |
| $D_K$                                | K <sup>+</sup> diffusion constant      | $1.96 \times 10^{-8}$ | cm <sup>2</sup> · ms <sup>-1</sup> |
| $D_{Cl}$                             | Cl <sup>-</sup> diffusion constant     | $2.03 \times 10^{-8}$ | cm <sup>2</sup> · ms <sup>-1</sup> |
| $D_{Ca}$                             | Ca <sup>2+</sup> diffusion constant    | $7.1 \times 10^{-9}$  | cm <sup>2</sup> · ms <sup>-1</sup> |
| $\lambda_i$                          | intracellular tortuosity               | 3.2                   |                                    |
| $\lambda_e$                          | extracellular tortuosity               | 1.6                   |                                    |
| $\gamma_{Na}, \gamma_K, \gamma_{Cl}$ | intraneuronal fractions of mobile ions | 1                     |                                    |
| $\gamma_{Ca}$                        | intraneuronal fraction of mobile ions  | 0.01                  |                                    |

**Table S3. Temperature and physical constants**

| Parameter |                      | Value                | Units                         |
|-----------|----------------------|----------------------|-------------------------------|
| $T$       | absolute temperature | 309.14               | K                             |
| $F$       | Faraday constant     | $9.6480 \times 10^4$ | nC · nmol <sup>-1</sup>       |
| $R$       | gas constant         | $8.314 \times 10^3$  | pJ · (nmol · K) <sup>-1</sup> |

**Table S4. Membrane parameters**

| Parameter                            |                                                                         | Value                 | Units                                                      |
|--------------------------------------|-------------------------------------------------------------------------|-----------------------|------------------------------------------------------------|
| $C_m$                                | specific membrane capacitance                                           | 3                     | $\mu\text{F} \cdot \text{cm}^{-2}$                         |
| $\bar{g}_{\text{Na,leak,n}}$         | $\text{Na}^+$ neuron leak conductance                                   | 0.0246                | $\text{mS} \cdot \text{cm}^{-2}$                           |
| $\bar{g}_{\text{K,leak,n}}$          | $\text{K}^+$ neuron leak conductance                                    | 0.0245                | $\text{mS} \cdot \text{cm}^{-2}$                           |
| $\bar{g}_{\text{Cl,leak,n}}$         | $\text{Cl}^-$ neuron leak conductance                                   | 0.1                   | $\text{mS} \cdot \text{cm}^{-2}$                           |
| $\bar{g}_{\text{Na}}$                | maximal conductance of $\text{Na}^+$ current                            | 30                    | $\text{mS} \cdot \text{cm}^{-2}$                           |
| $\bar{g}_{\text{DR}}$                | maximal conductance of $\text{K}^+$ delayed rectifier current           | 15                    | $\text{mS} \cdot \text{cm}^{-2}$                           |
| $\bar{g}_{\text{Ca}}$                | maximal conductance of $\text{Ca}^{2+}$ current                         | 11.8                  | $\text{mS} \cdot \text{cm}^{-2}$                           |
| $\bar{g}_{\text{AHP}}$               | maximal conductance of AHP current                                      | 0.8                   | $\text{mS} \cdot \text{cm}^{-2}$                           |
| $\bar{g}_{\text{C}}$                 | maximal conductance of $\text{Ca}^{2+}$ -dependent $\text{K}^+$ current | 15                    | $\text{mS} \cdot \text{cm}^{-2}$                           |
| $\rho_n$                             | $\text{Na}^+/\text{K}^+$ neuron pump strength                           | $1.87 \times 10^{-4}$ | $\text{nmol} \cdot \text{cm}^{-2} \cdot \text{ms}^{-1}$    |
| $U_{\text{kcc2}}$                    | KCC2 cotransporter strength                                             | $1.49 \times 10^{-5}$ | $\text{nmol} \cdot \text{cm}^{-2} \cdot \text{ms}^{-1}$    |
| $U_{\text{nkcc1}}$                   | NKCC1 cotransporter strength                                            | $2.33 \times 10^{-5}$ | $\text{nmol} \cdot \text{cm}^{-2} \cdot \text{ms}^{-1}$    |
| $U_{\text{Ca-dec}}$                  | $\text{Ca}^{2+}$ decay rate                                             | 0.075                 | $\text{ms}^{-1}$                                           |
| $\bar{g}_{\text{Na,leak,g}}$         | $\text{Na}^+$ glial leak conductance                                    | 0.1                   | $\text{mS} \cdot \text{cm}^{-2}$                           |
| $\bar{g}_{\text{K-IR}}$              | $\text{K}^+$ glial leak conductance                                     | 1.696                 | $\text{mS} \cdot \text{cm}^{-2}$                           |
| $\bar{g}_{\text{Cl,leak,g}}$         | $\text{Cl}^-$ glial leak conductance                                    | 0.01                  | $\text{mS} \cdot \text{cm}^{-2}$                           |
| $\rho_g$                             | $\text{Na}^+/\text{K}^+$ glial pump strength                            | $1.12 \times 10^{-4}$ | $\text{nmol} \cdot \text{cm}^{-2} \cdot \text{ms}^{-1}$    |
| $[\text{Na}^+]_{\text{g,threshold}}$ | $[\text{Na}^+]$ threshold for $\text{Na}^+/\text{K}^+$ glial pump       | $1 \times 10^4$       | $\text{nmol} \cdot \text{cm}^{-3}$                         |
| $[\text{K}^+]_{\text{e,threshold}}$  | $[\text{K}^+]$ threshold for $\text{Na}^+/\text{K}^+$ glial pump        | $1.5 \times 10^3$     | $\text{nmol} \cdot \text{cm}^{-3}$                         |
| $G_n$                                | neuron water permeability                                               | $2 \times 10^{-26}$   | $\text{cm}^3 \cdot \mu\text{Pa}^{-3} \cdot \text{ms}^{-1}$ |
| $G_g$                                | glial water permeability                                                | $5 \times 10^{-26}$   | $\text{cm}^3 \cdot \mu\text{Pa}^{-3} \cdot \text{ms}^{-1}$ |

**Table S5. Basal ion concentrations**

| Parameter                       | Value  | Units |
|---------------------------------|--------|-------|
| $[\text{K}^+]_{\text{e,b}}$     | 3.082  | mM    |
| $[\text{K}^+]_{\text{g,b}}$     | 99.959 | mM    |
| $[\text{Ca}^{2+}]_{\text{n,b}}$ | 0.01   | mM    |

Note that the system implementation provides basal ion concentrations in  $\text{nmol} \cdot \text{cm}^{-3}$ .

**Table S6. Initial conditions**

| <b>Variable</b>          | <b>Value*</b> | <b>Units</b> |
|--------------------------|---------------|--------------|
| $\phi_{mn,0}$            | -66.9         | mV           |
| $\phi_{mg,0}$            | -83.9         | mV           |
| $[\text{Na}^+]_{n,0}$    | 18.7          | mM           |
| $[\text{Na}^+]_{e,0}$    | 142.3         | mM           |
| $[\text{Na}^+]_{g,0}$    | 14.5          | mM           |
| $[\text{K}^+]_{n,0}$     | 138.1         | mM           |
| $[\text{K}^+]_{e,0}$     | 3.54          | mM           |
| $[\text{K}^+]_{g,0}$     | 101.2         | mM           |
| $[\text{Cl}^-]_{n,0}$    | 7.15          | mM           |
| $[\text{Cl}^-]_{e,0}$    | 131.9         | mM           |
| $[\text{Cl}^-]_{g,0}$    | 5.65          | mM           |
| $[\text{Ca}^{2+}]_{n,0}$ | 0.01          | mM           |
| $[\text{Ca}^{2+}]_{e,0}$ | 1.10          | mM           |
| $n_0$                    | 0.0003        |              |
| $h_0$                    | 0.9993        |              |
| $s_0$                    | 0.0077        |              |
| $c_0$                    | 0.0057        |              |
| $q_0$                    | 0.0117        |              |
| $z_0$                    | 1.0           |              |

Note that  $\phi_{mn}$  and  $\phi_{mg}$  are not independent state variables, but calculated from the ion concentrations at each time step. Their "initial conditions" are used to calculate the amount of immobile ions in the system. Moreover, the system implementation provides initial conditions for ion dynamics expressed in nmol.

\* Values with more decimals included were read to/from file and used in the simulations.
